# Supplementary material
Source: PubMed Central journal article supplement (PMC4542252)

## Supplemental materials

Figure S1: Weighted UniFrac PCoA plots separate ticks based on collection site in 454 data.

Figure S2: Intra-state, weighted UniFrac distances between ticks.

Table S1: OTU table from Illumina high seq, unrarefied

Table S2: OTU table from Illumina high seq, rarefied to 10,000 sequences/sample. Table was used for analyses in the paper.

Table S3: OTU table from 454 analysis.

Table S4: OTU table from 454 analysis rarefied to 3800 sequences/sample. Table was used for analyses in the paper.

Table S5: Mapping file containing metadata for Illumina sequenced samples.

Table S6: Mapping file containing metadata for 454 sequenced samples.

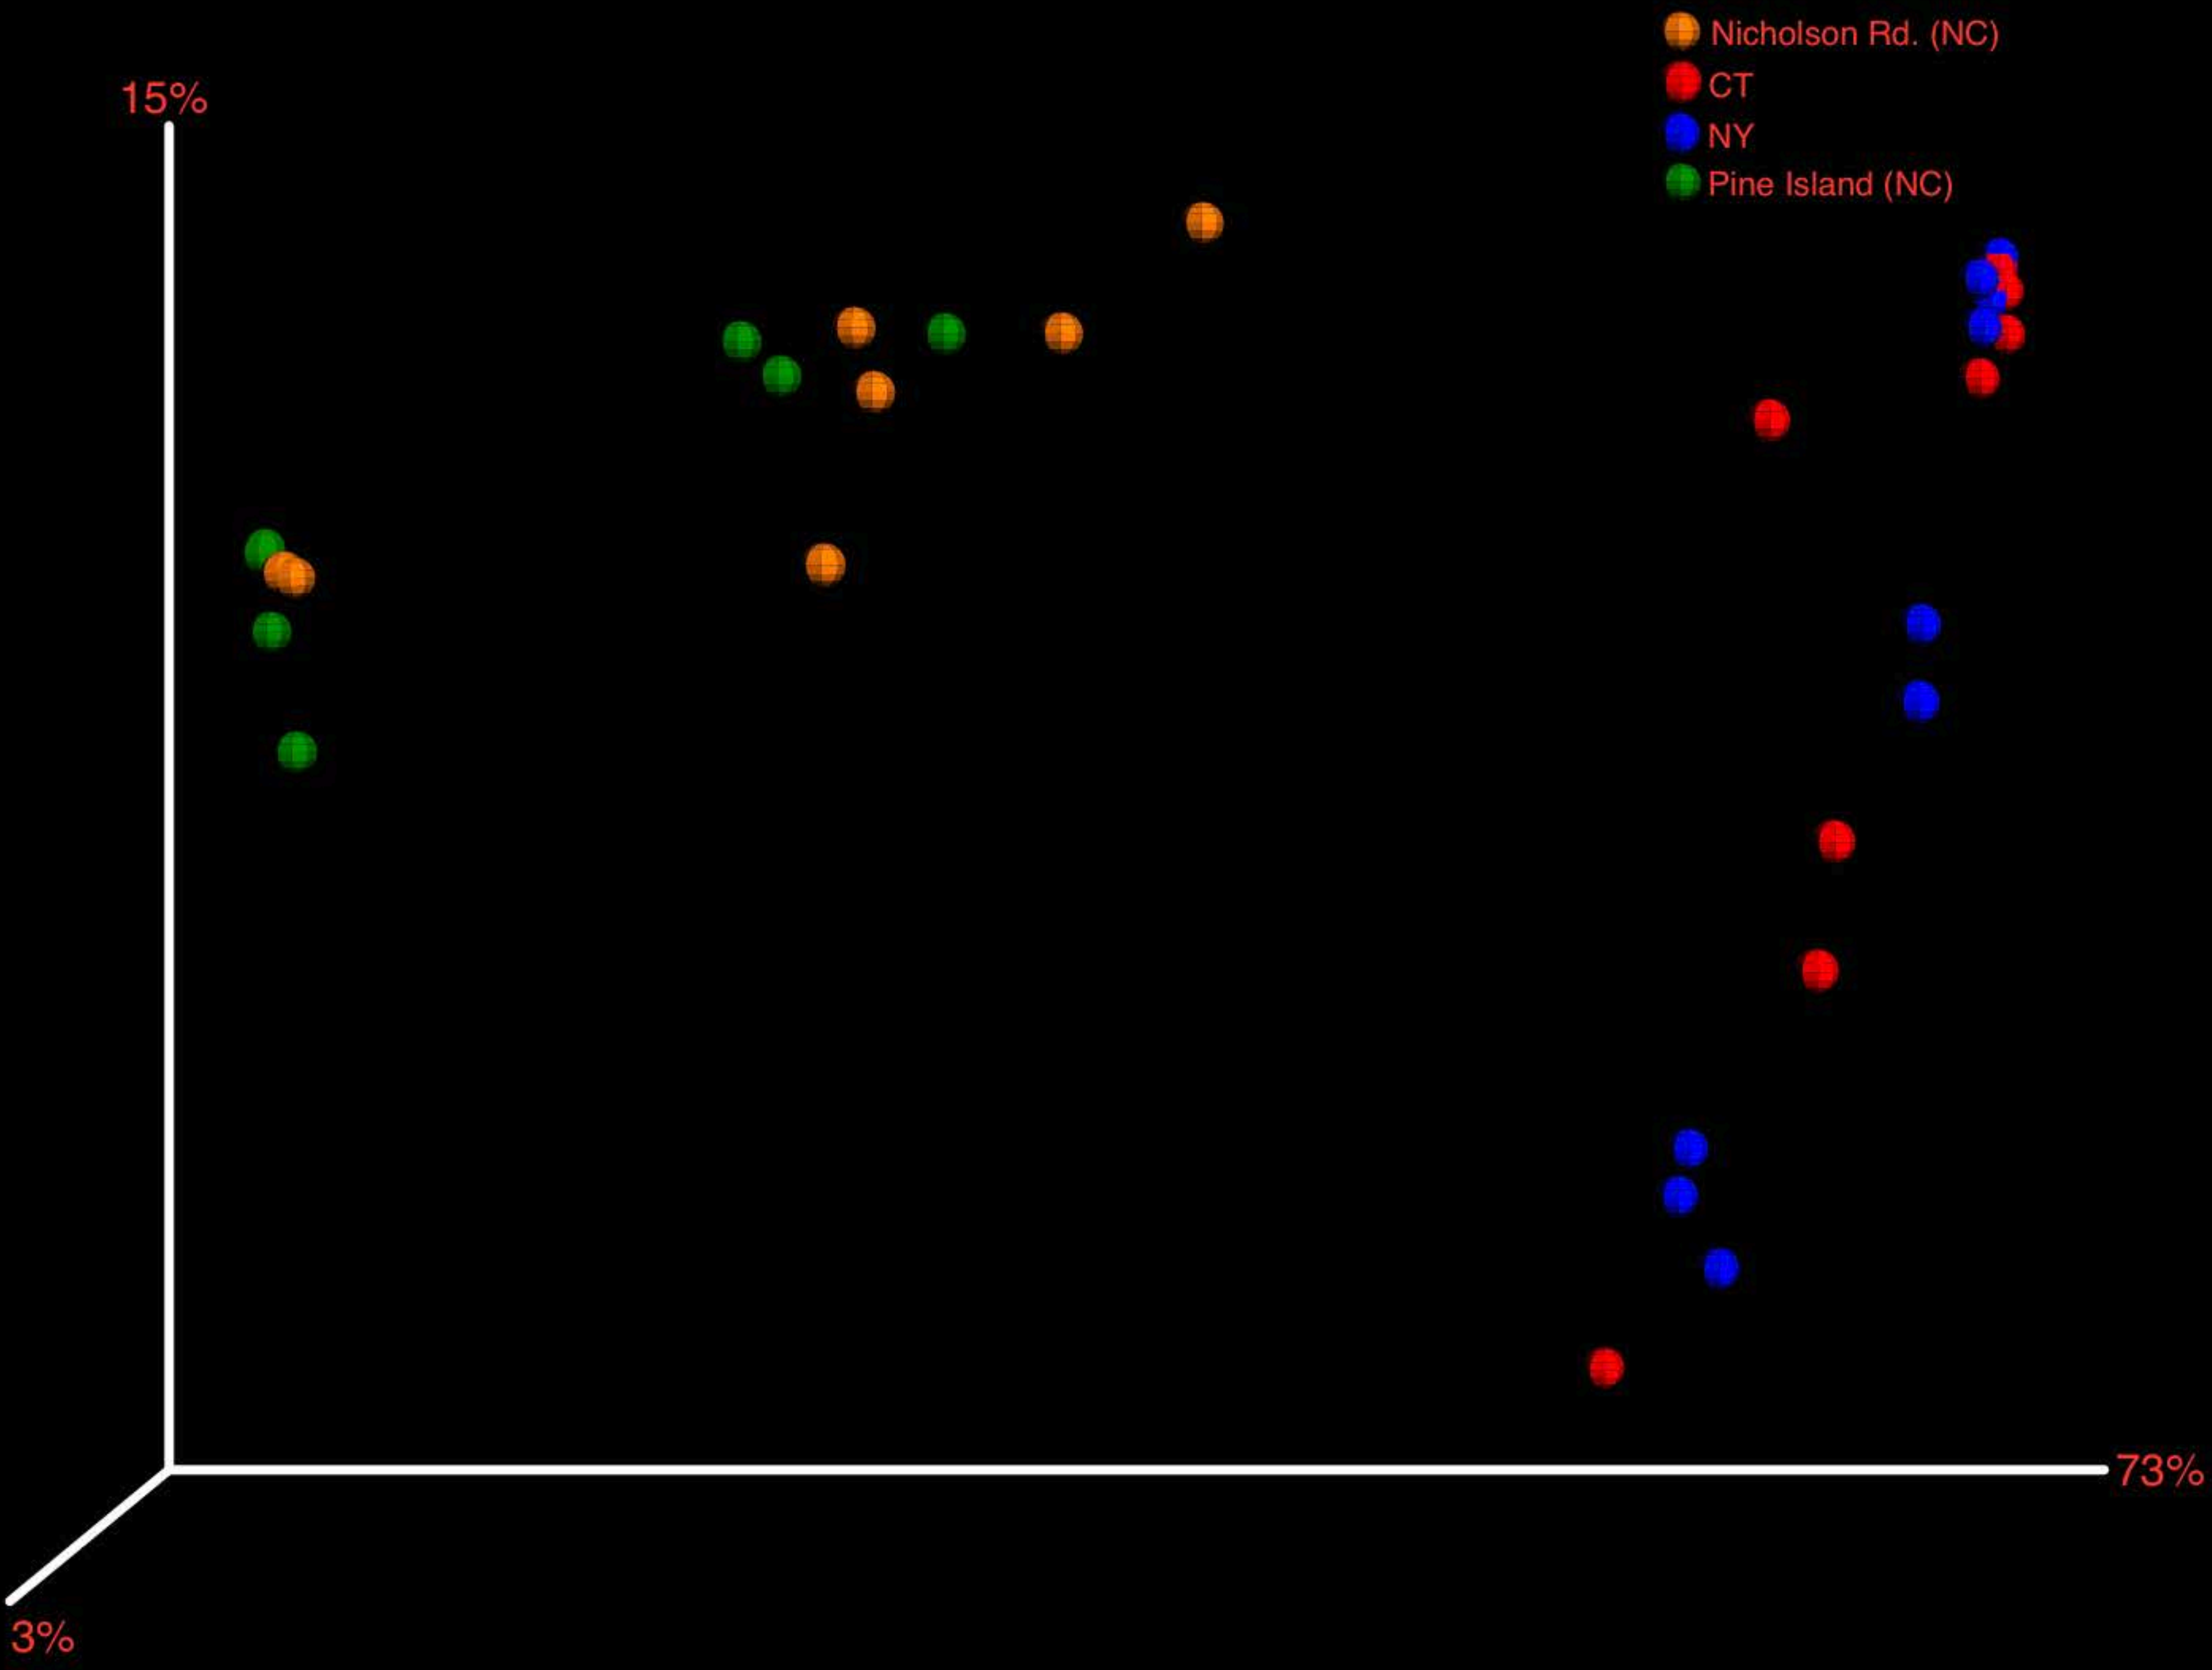

state Distances

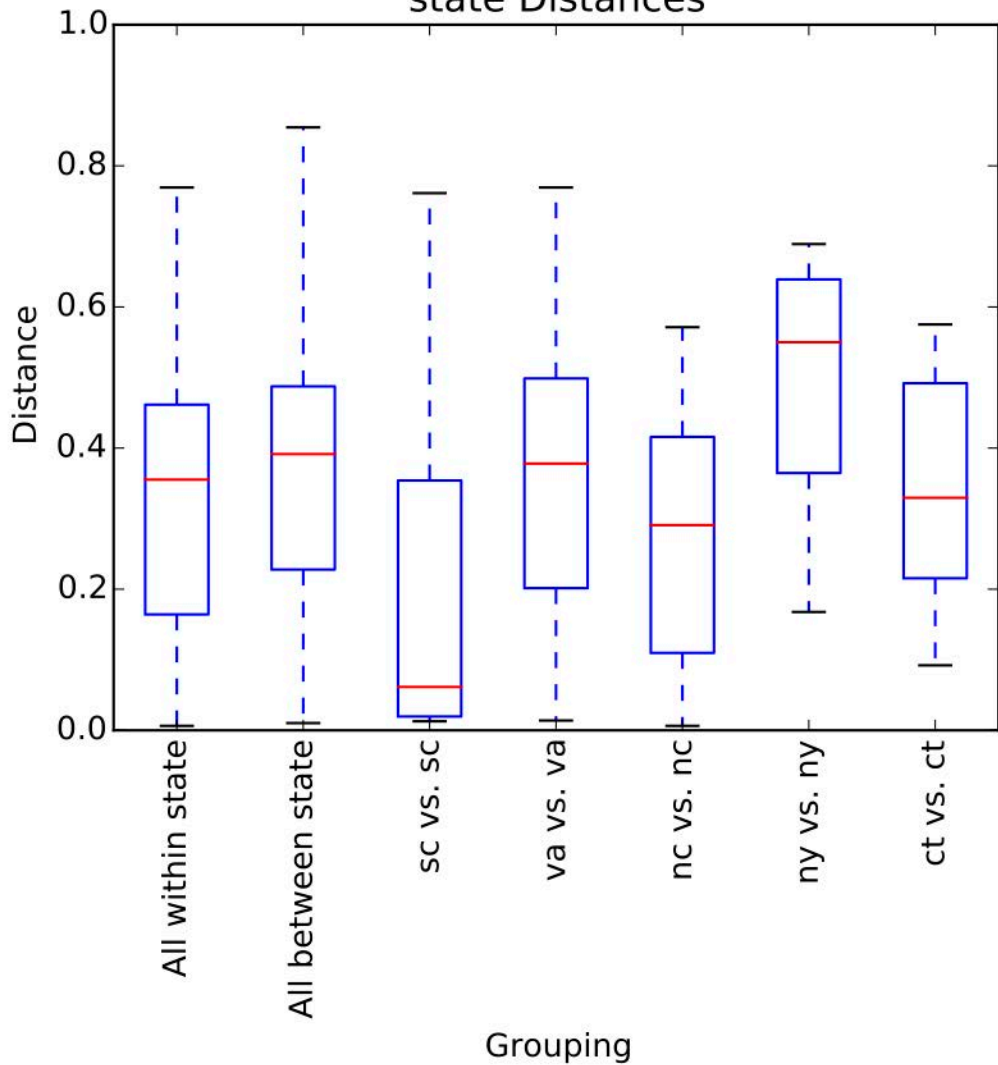

Supplement: AEM.01562-15_zam999116548so1.pdf [file AEM.01562-15_zam999116548so1.pdf]
